# Supplementary figures and images for: An expanded toolkit for gene tagging based on MiMIC and scarless CRISPR tagging in Drosophila
Source: eLife journal article supplement (doi:10.7554/elife.38709), 2018-08-09

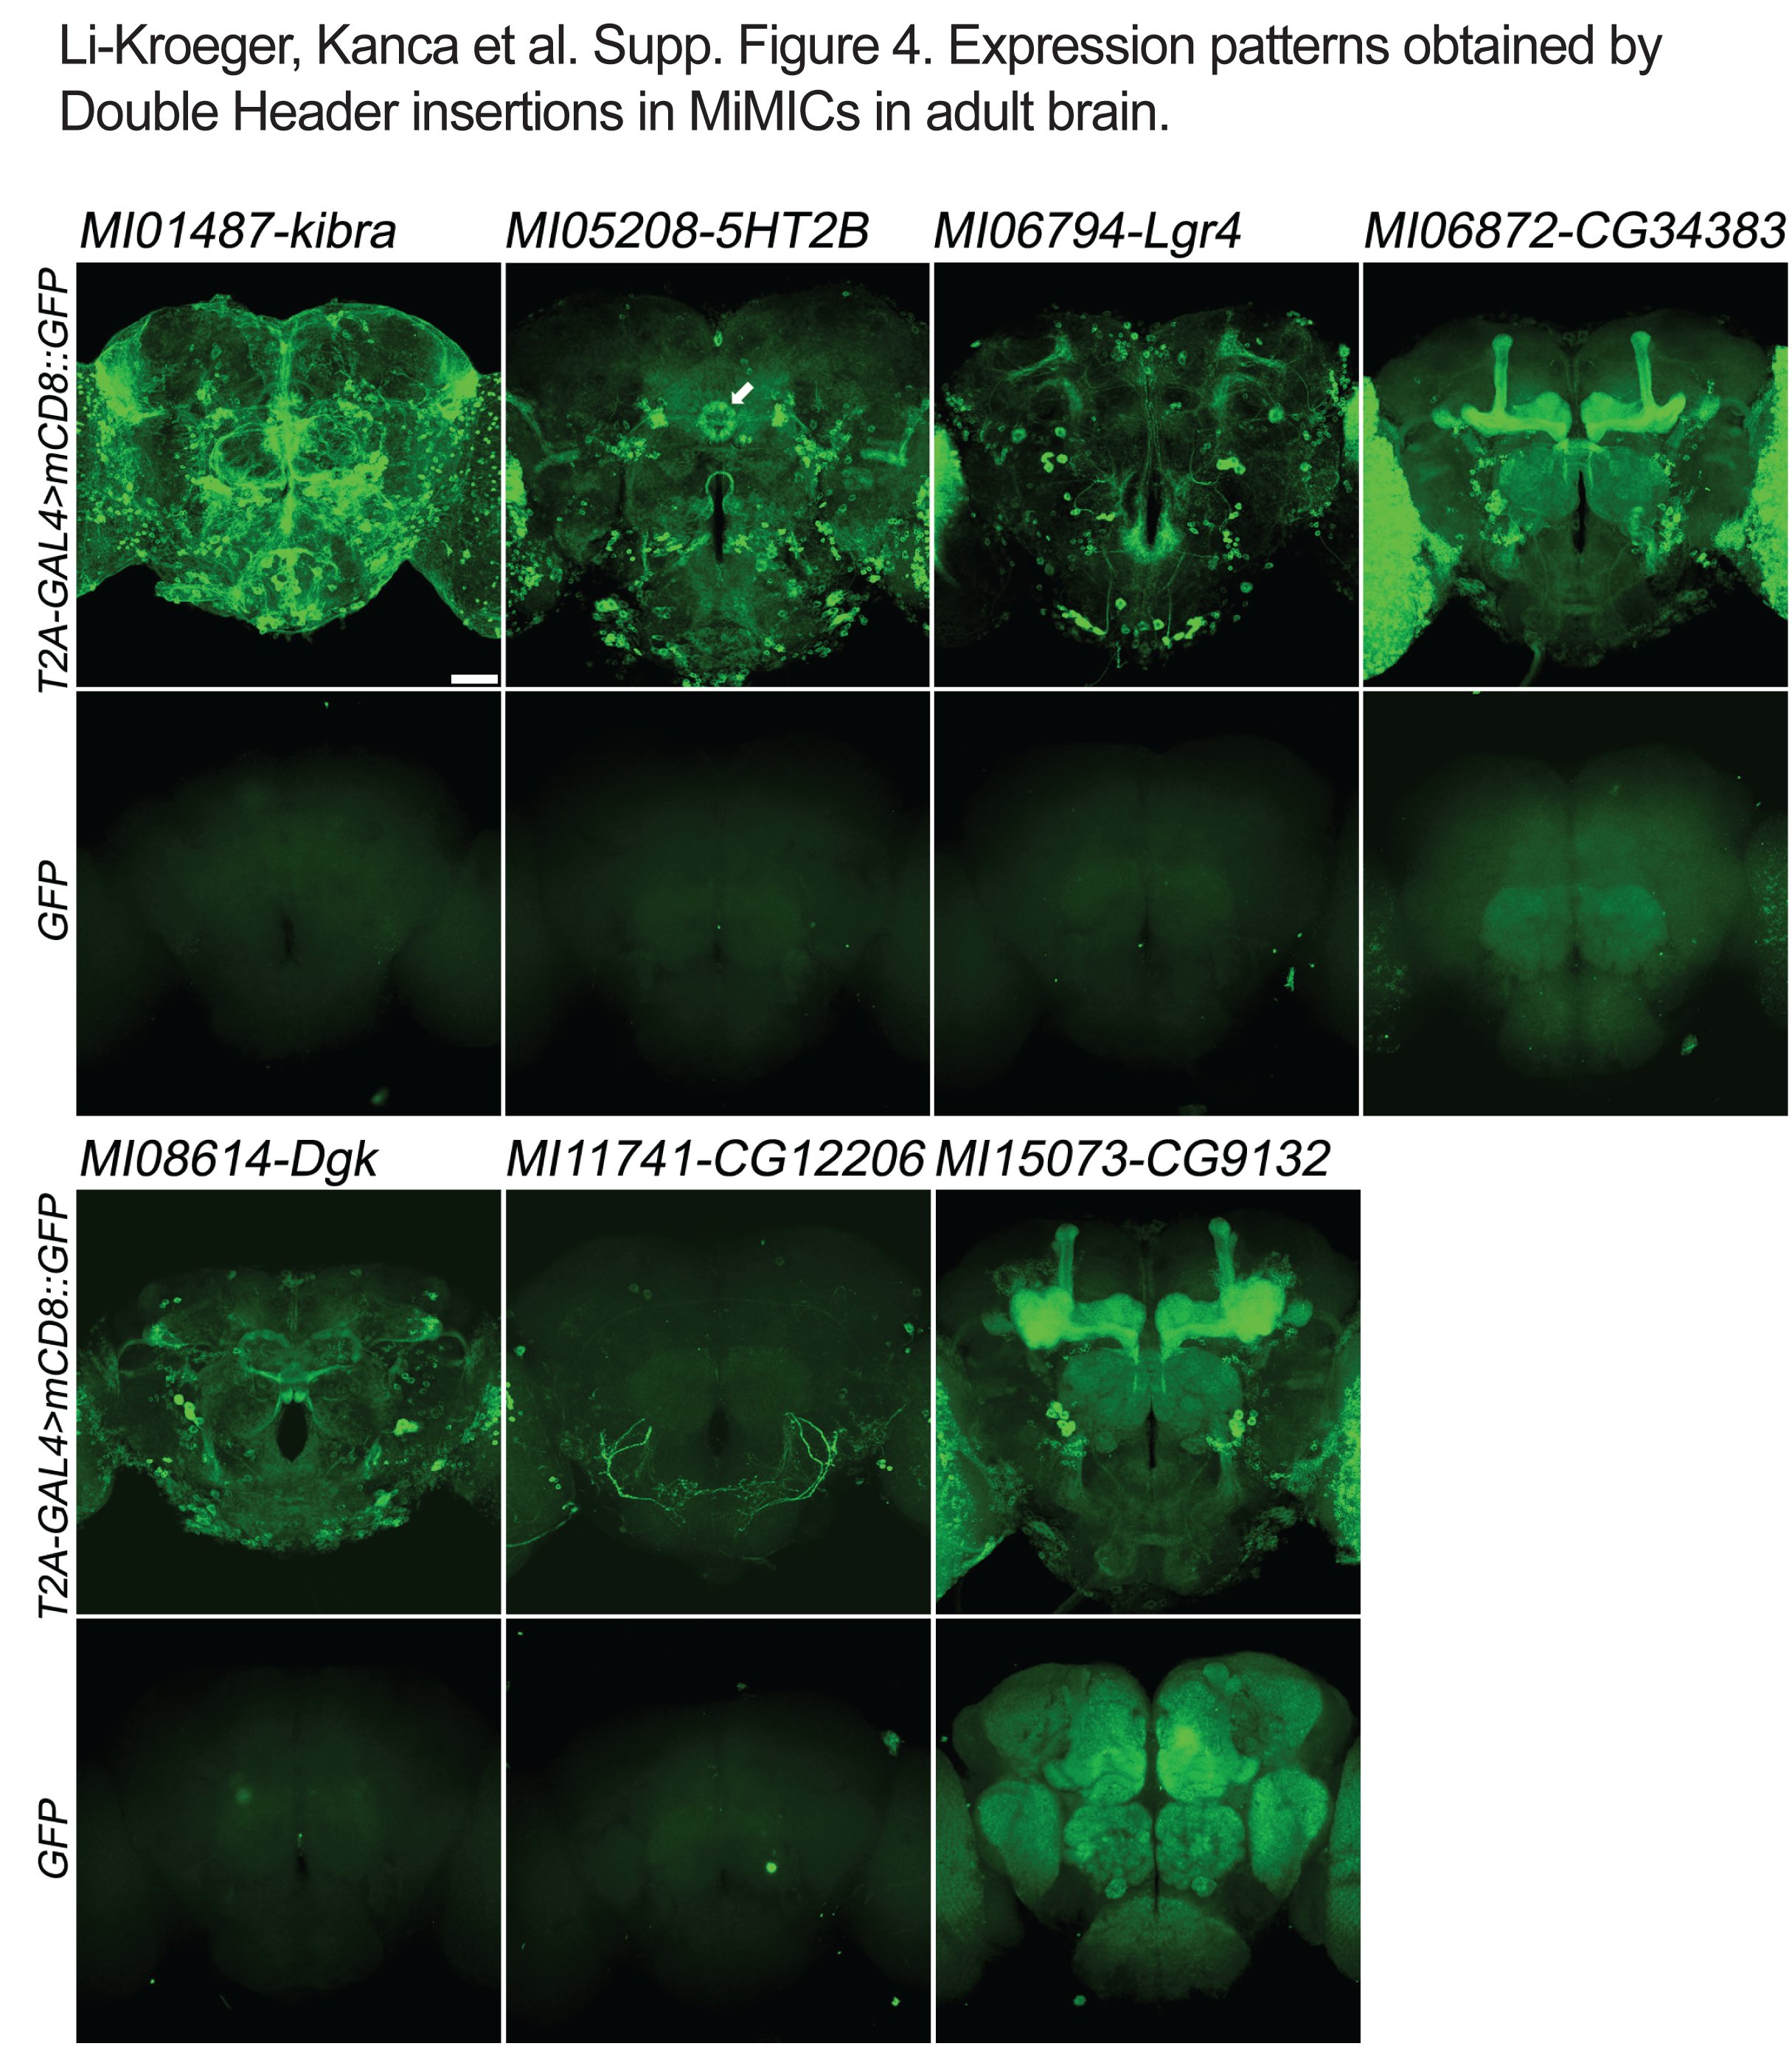

Supplement: supp [file elife-38709-supp-v1.zip › elife_poa_e38709_Figure_3_figure_supplement_1.tif]

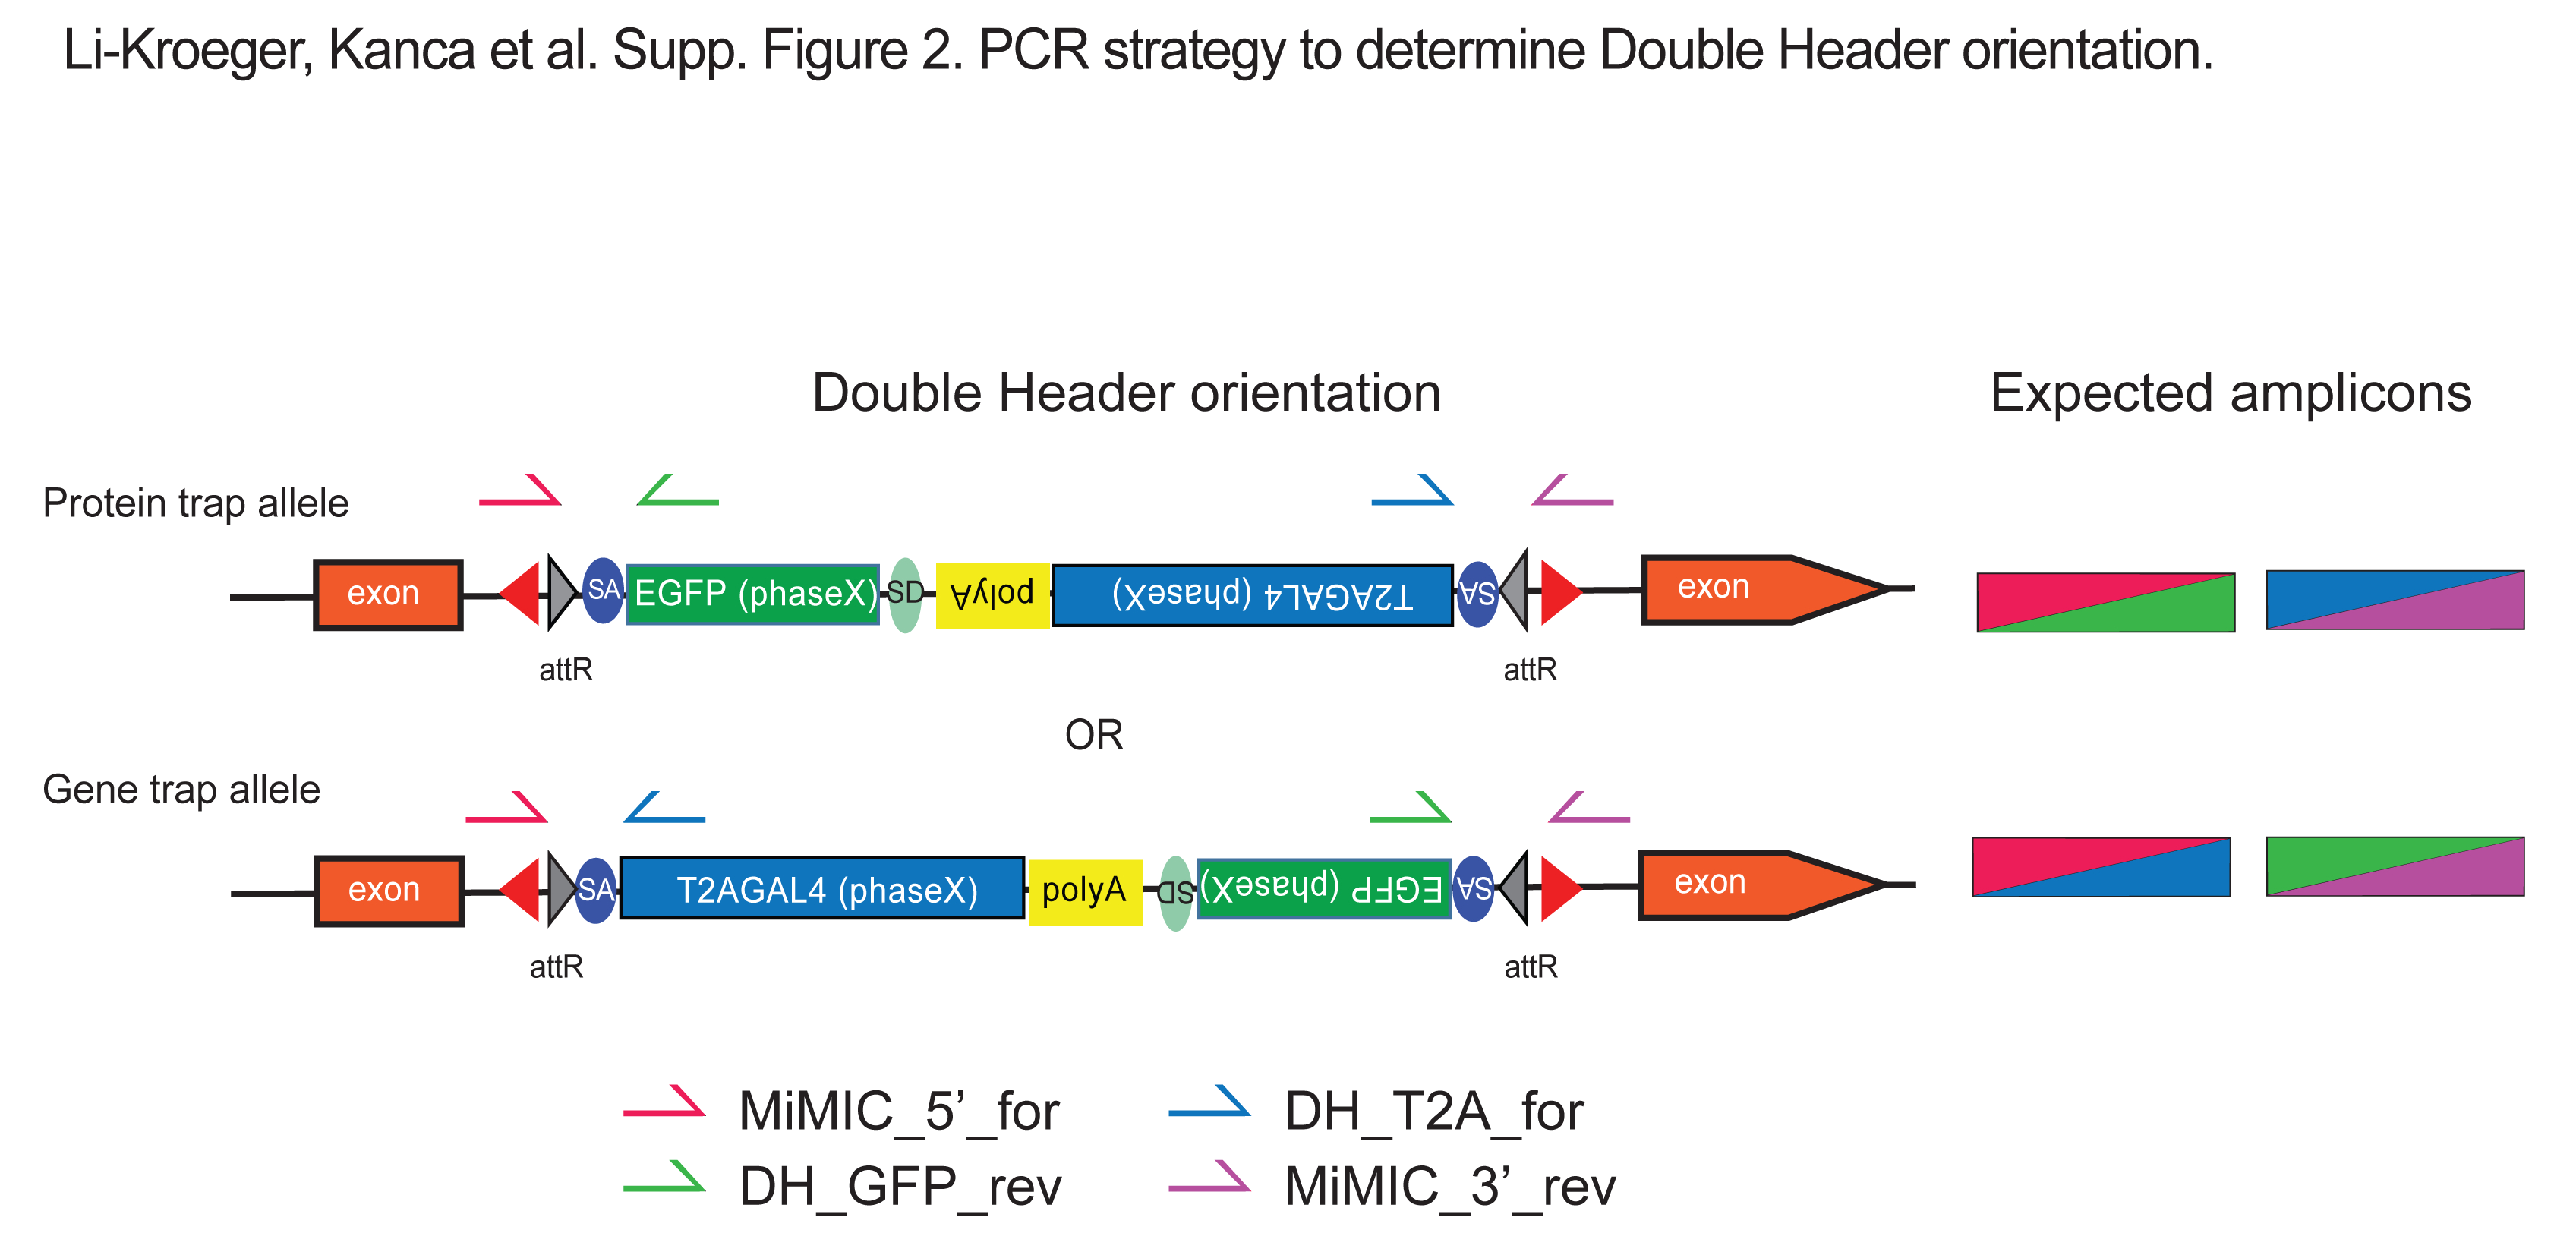

Supplement: supp [file elife-38709-supp-v1.zip › elife_poa_e38709_Figure_1_figure_supplement_2.tif]

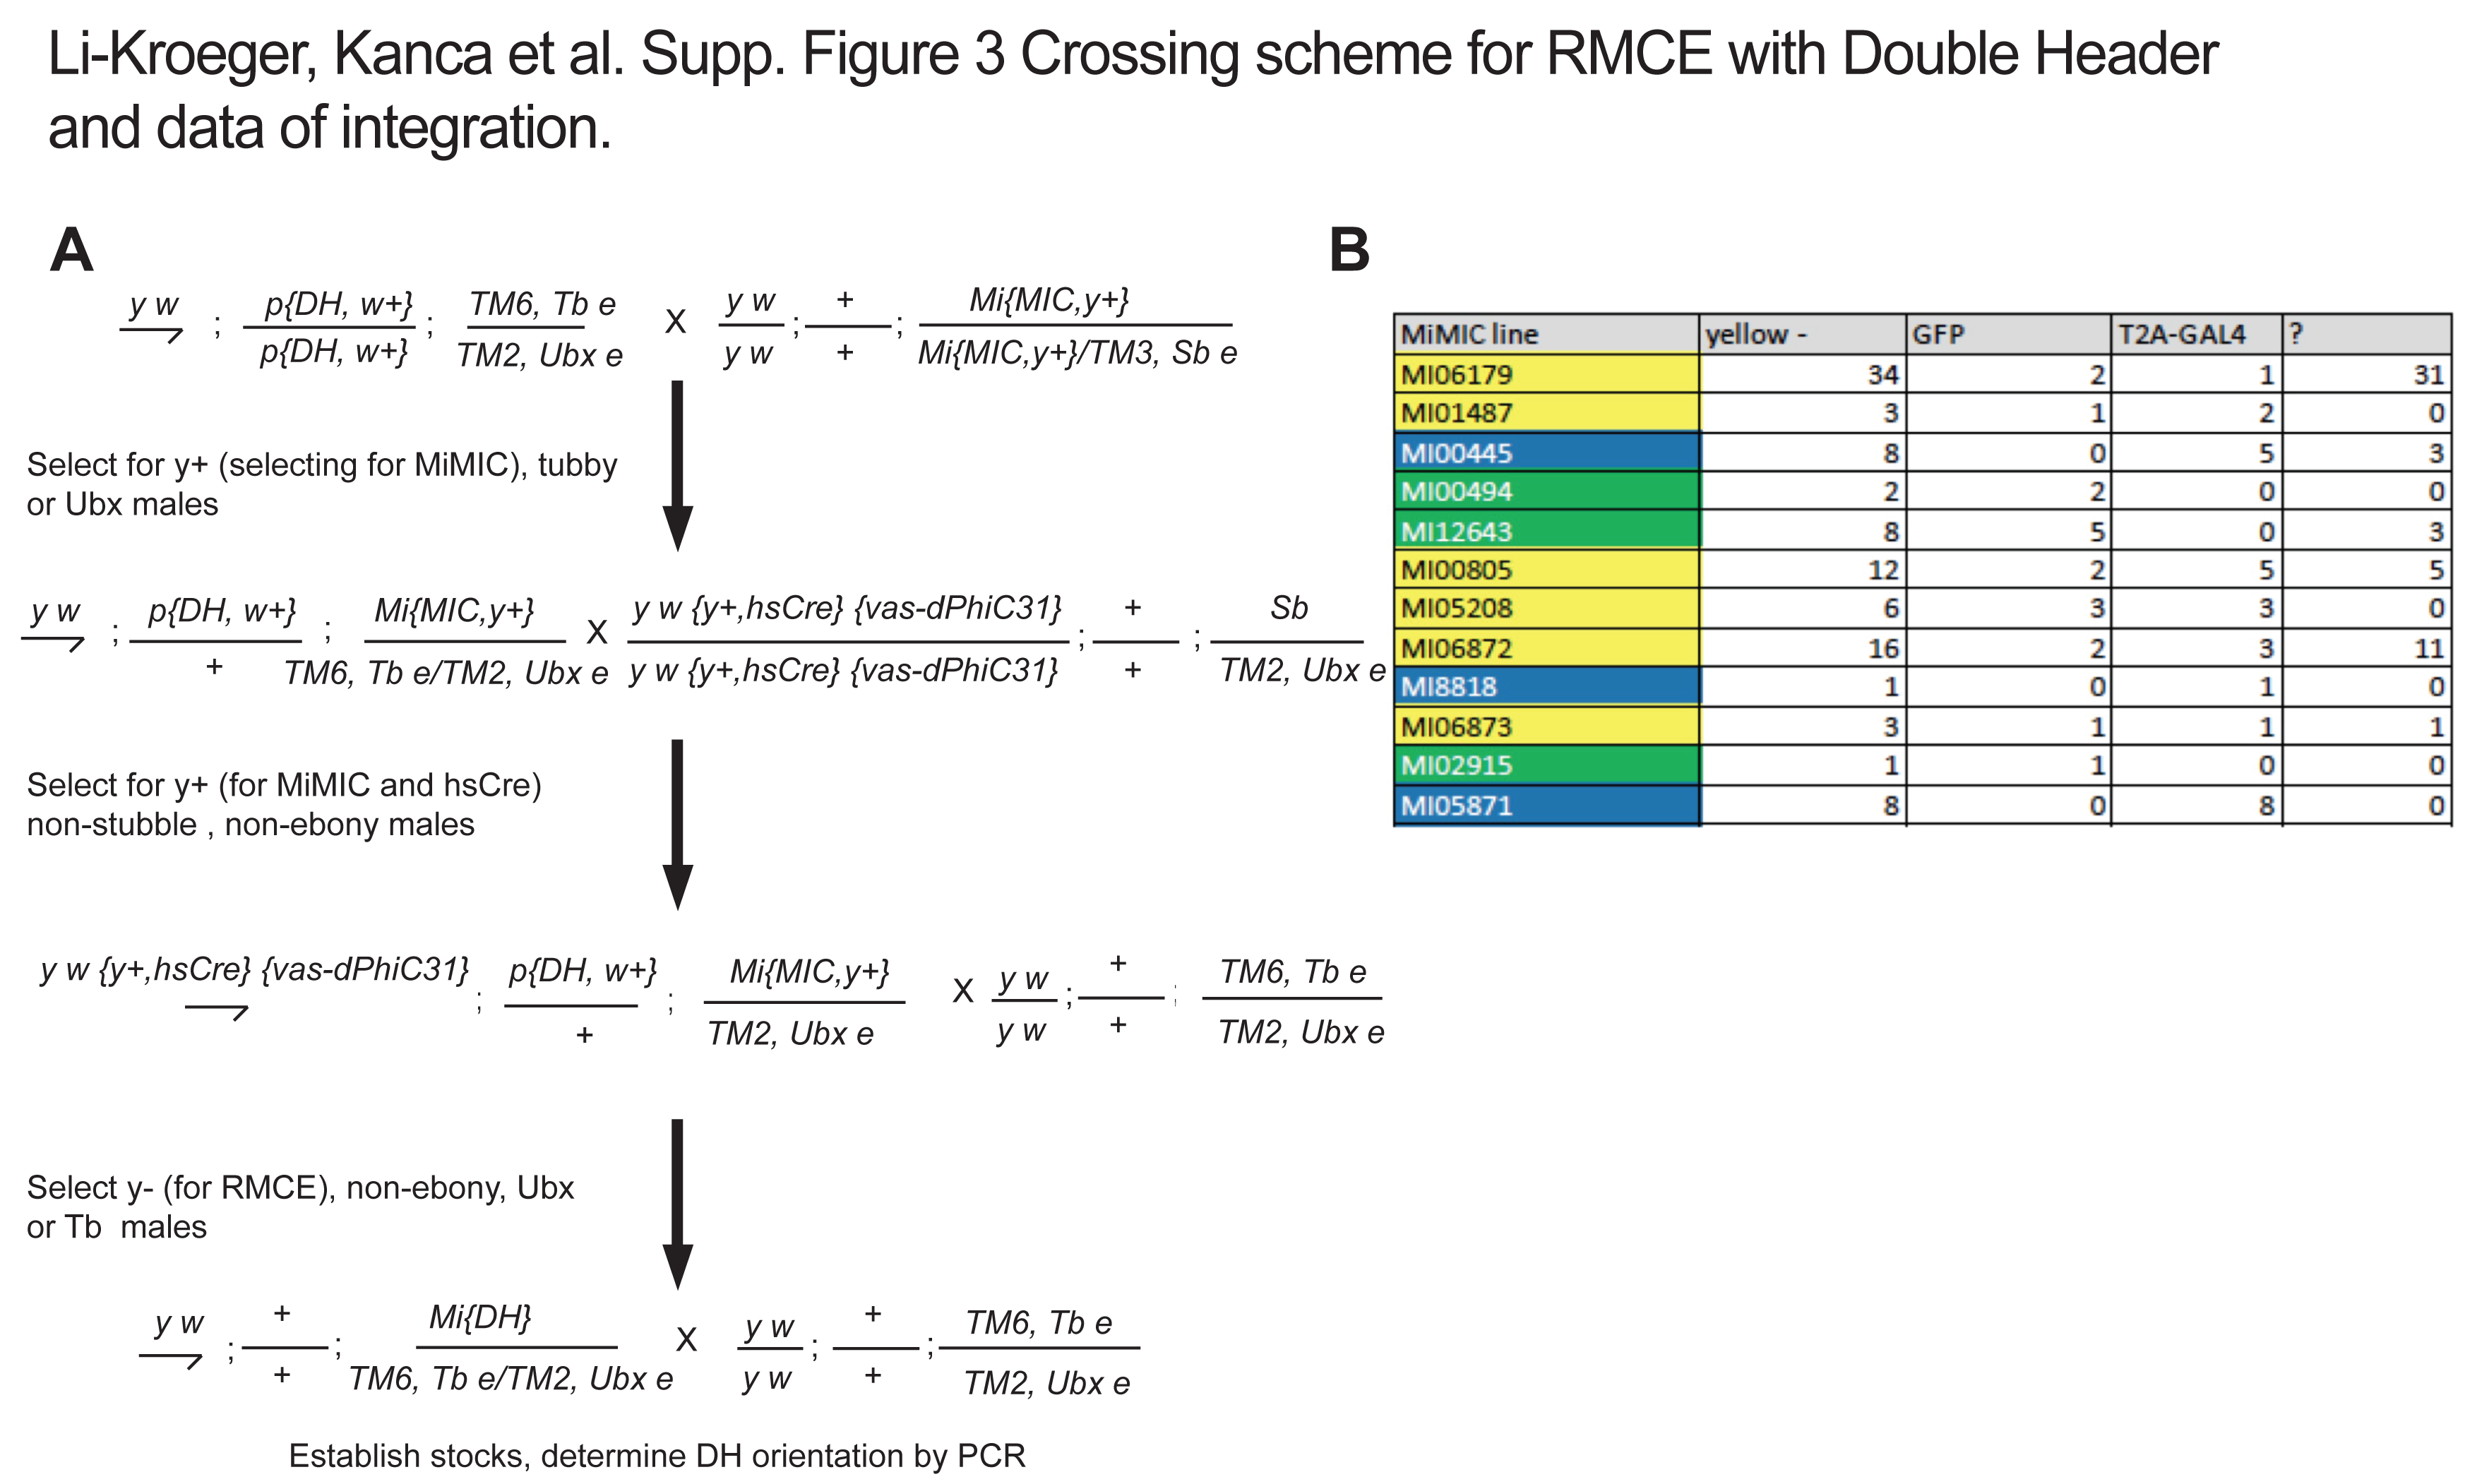

Supplement: supp [file elife-38709-supp-v1.zip › elife_poa_e38709_Figure_2_figure_supplement_1.tif]

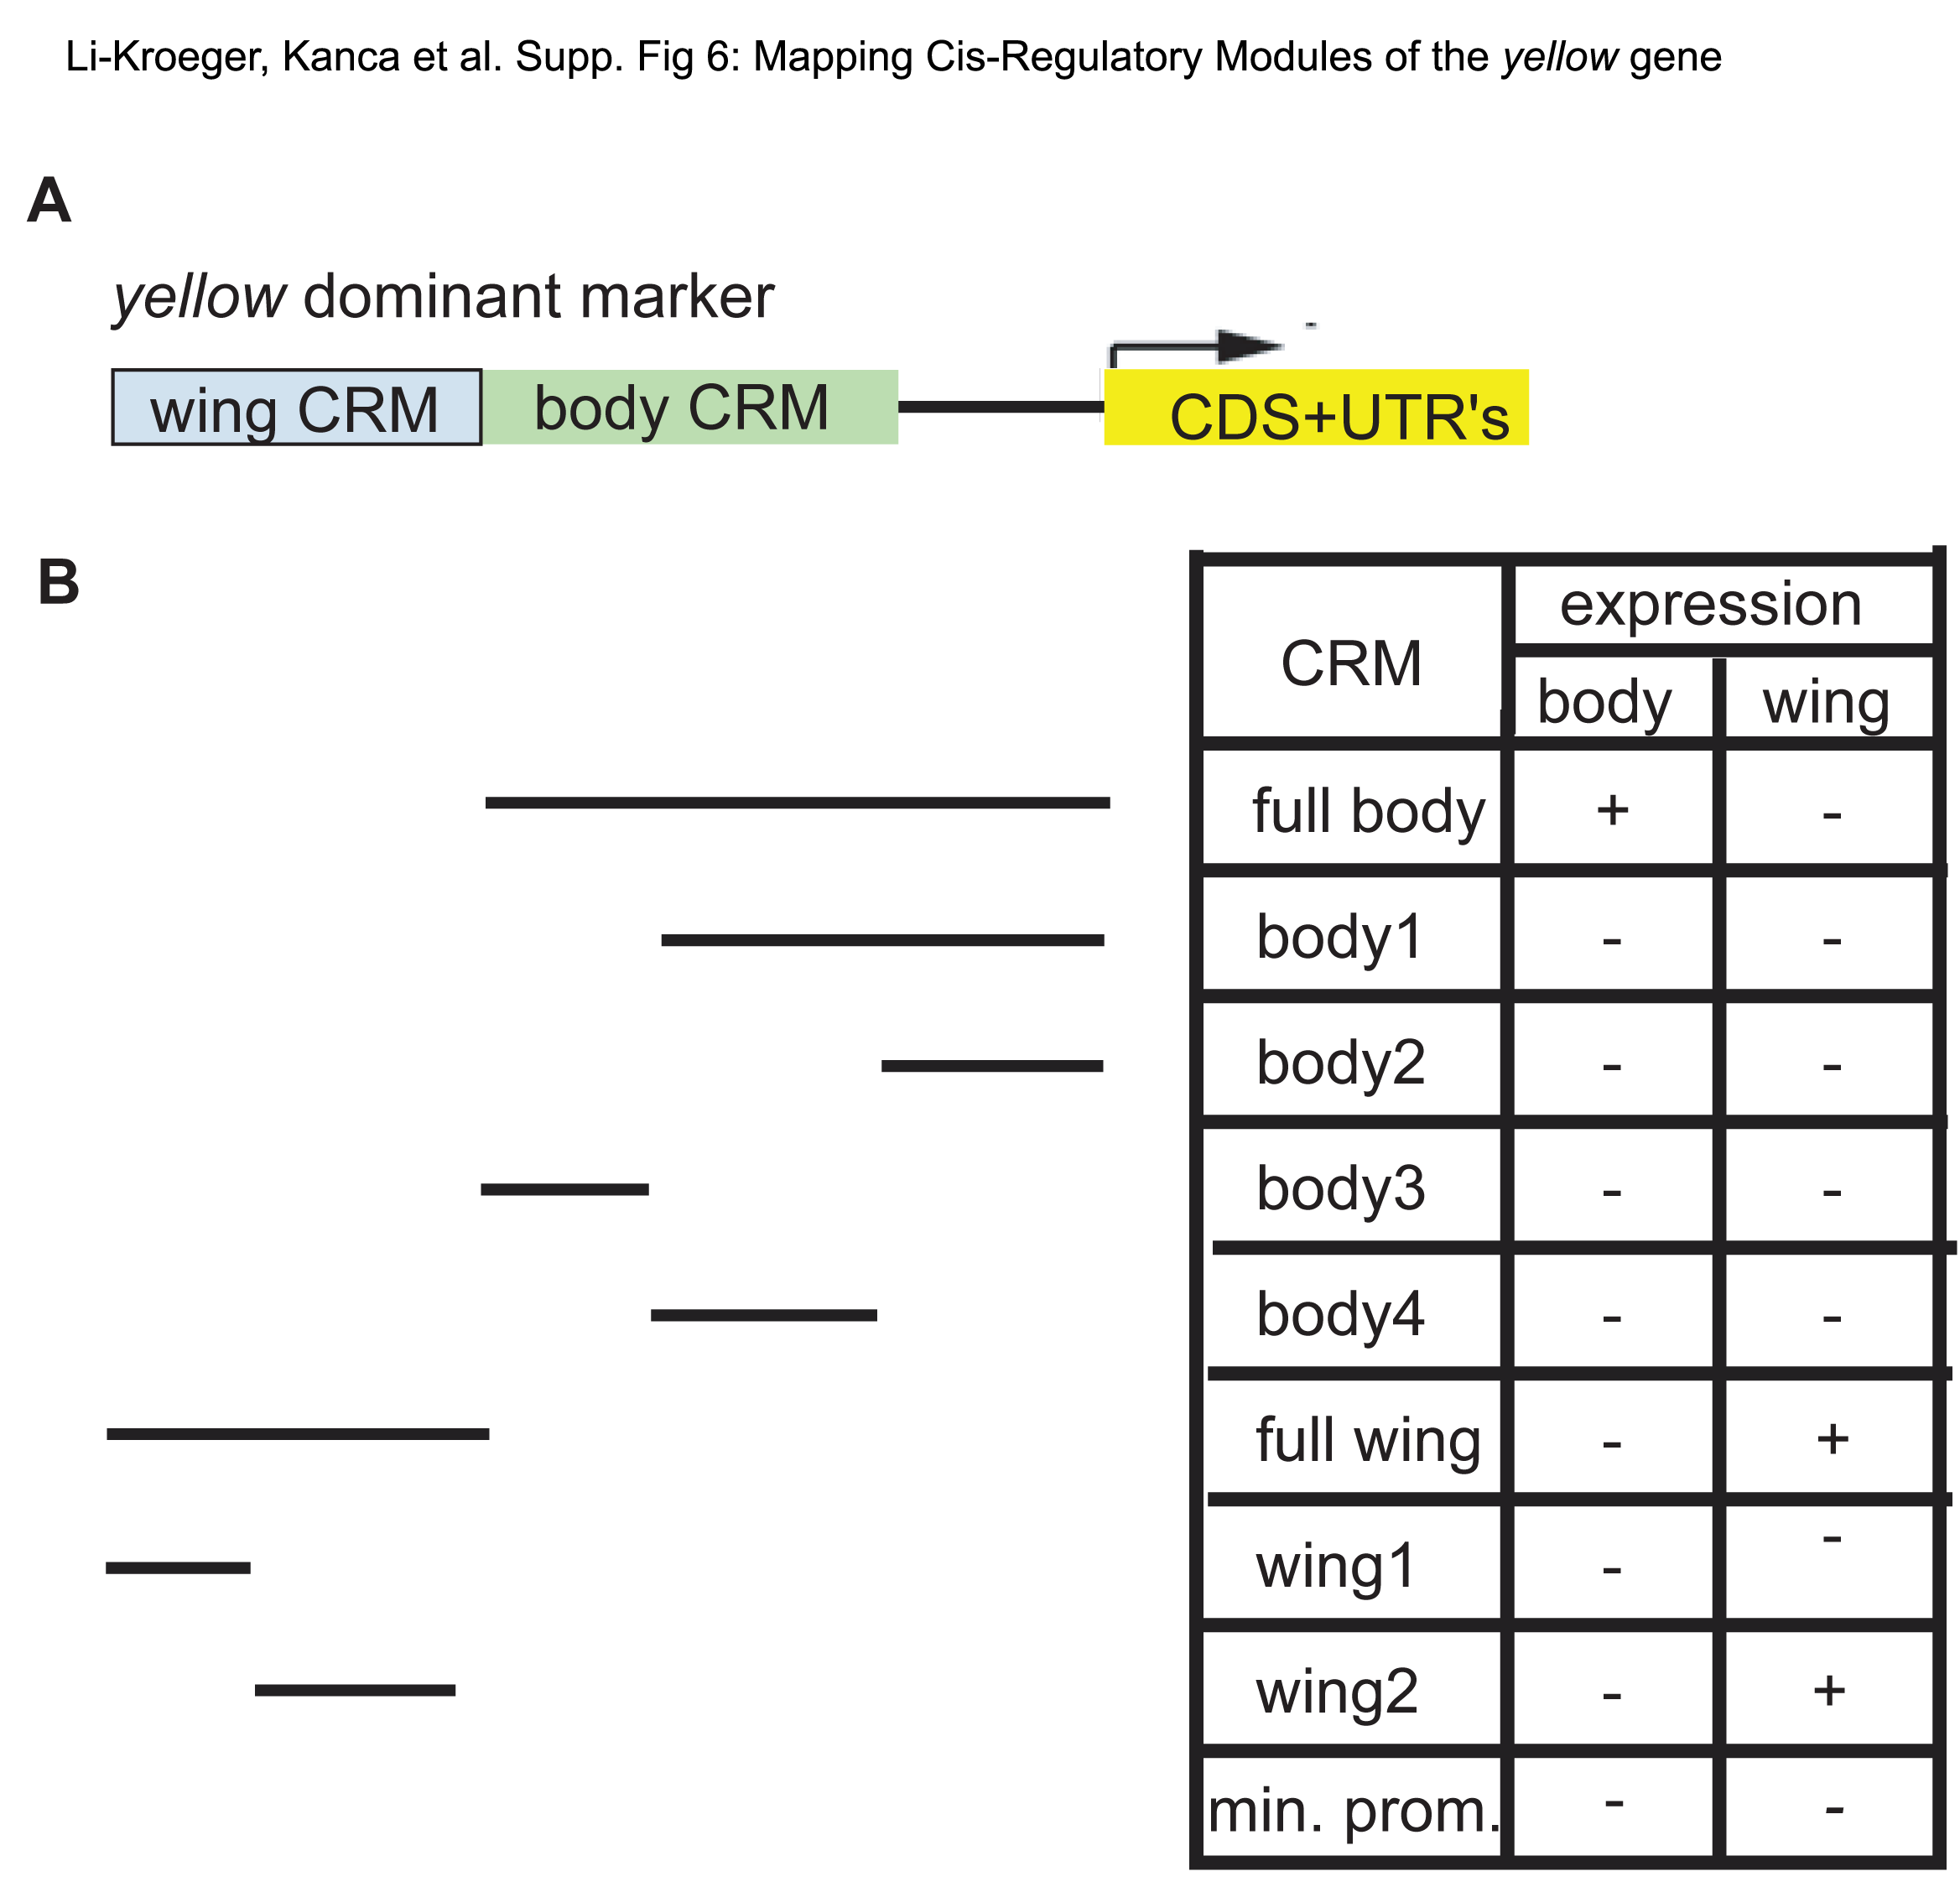

Supplement: supp [file elife-38709-supp-v1.zip › elife_poa_e38709_Figure_5_figure_supplement_2.tif]

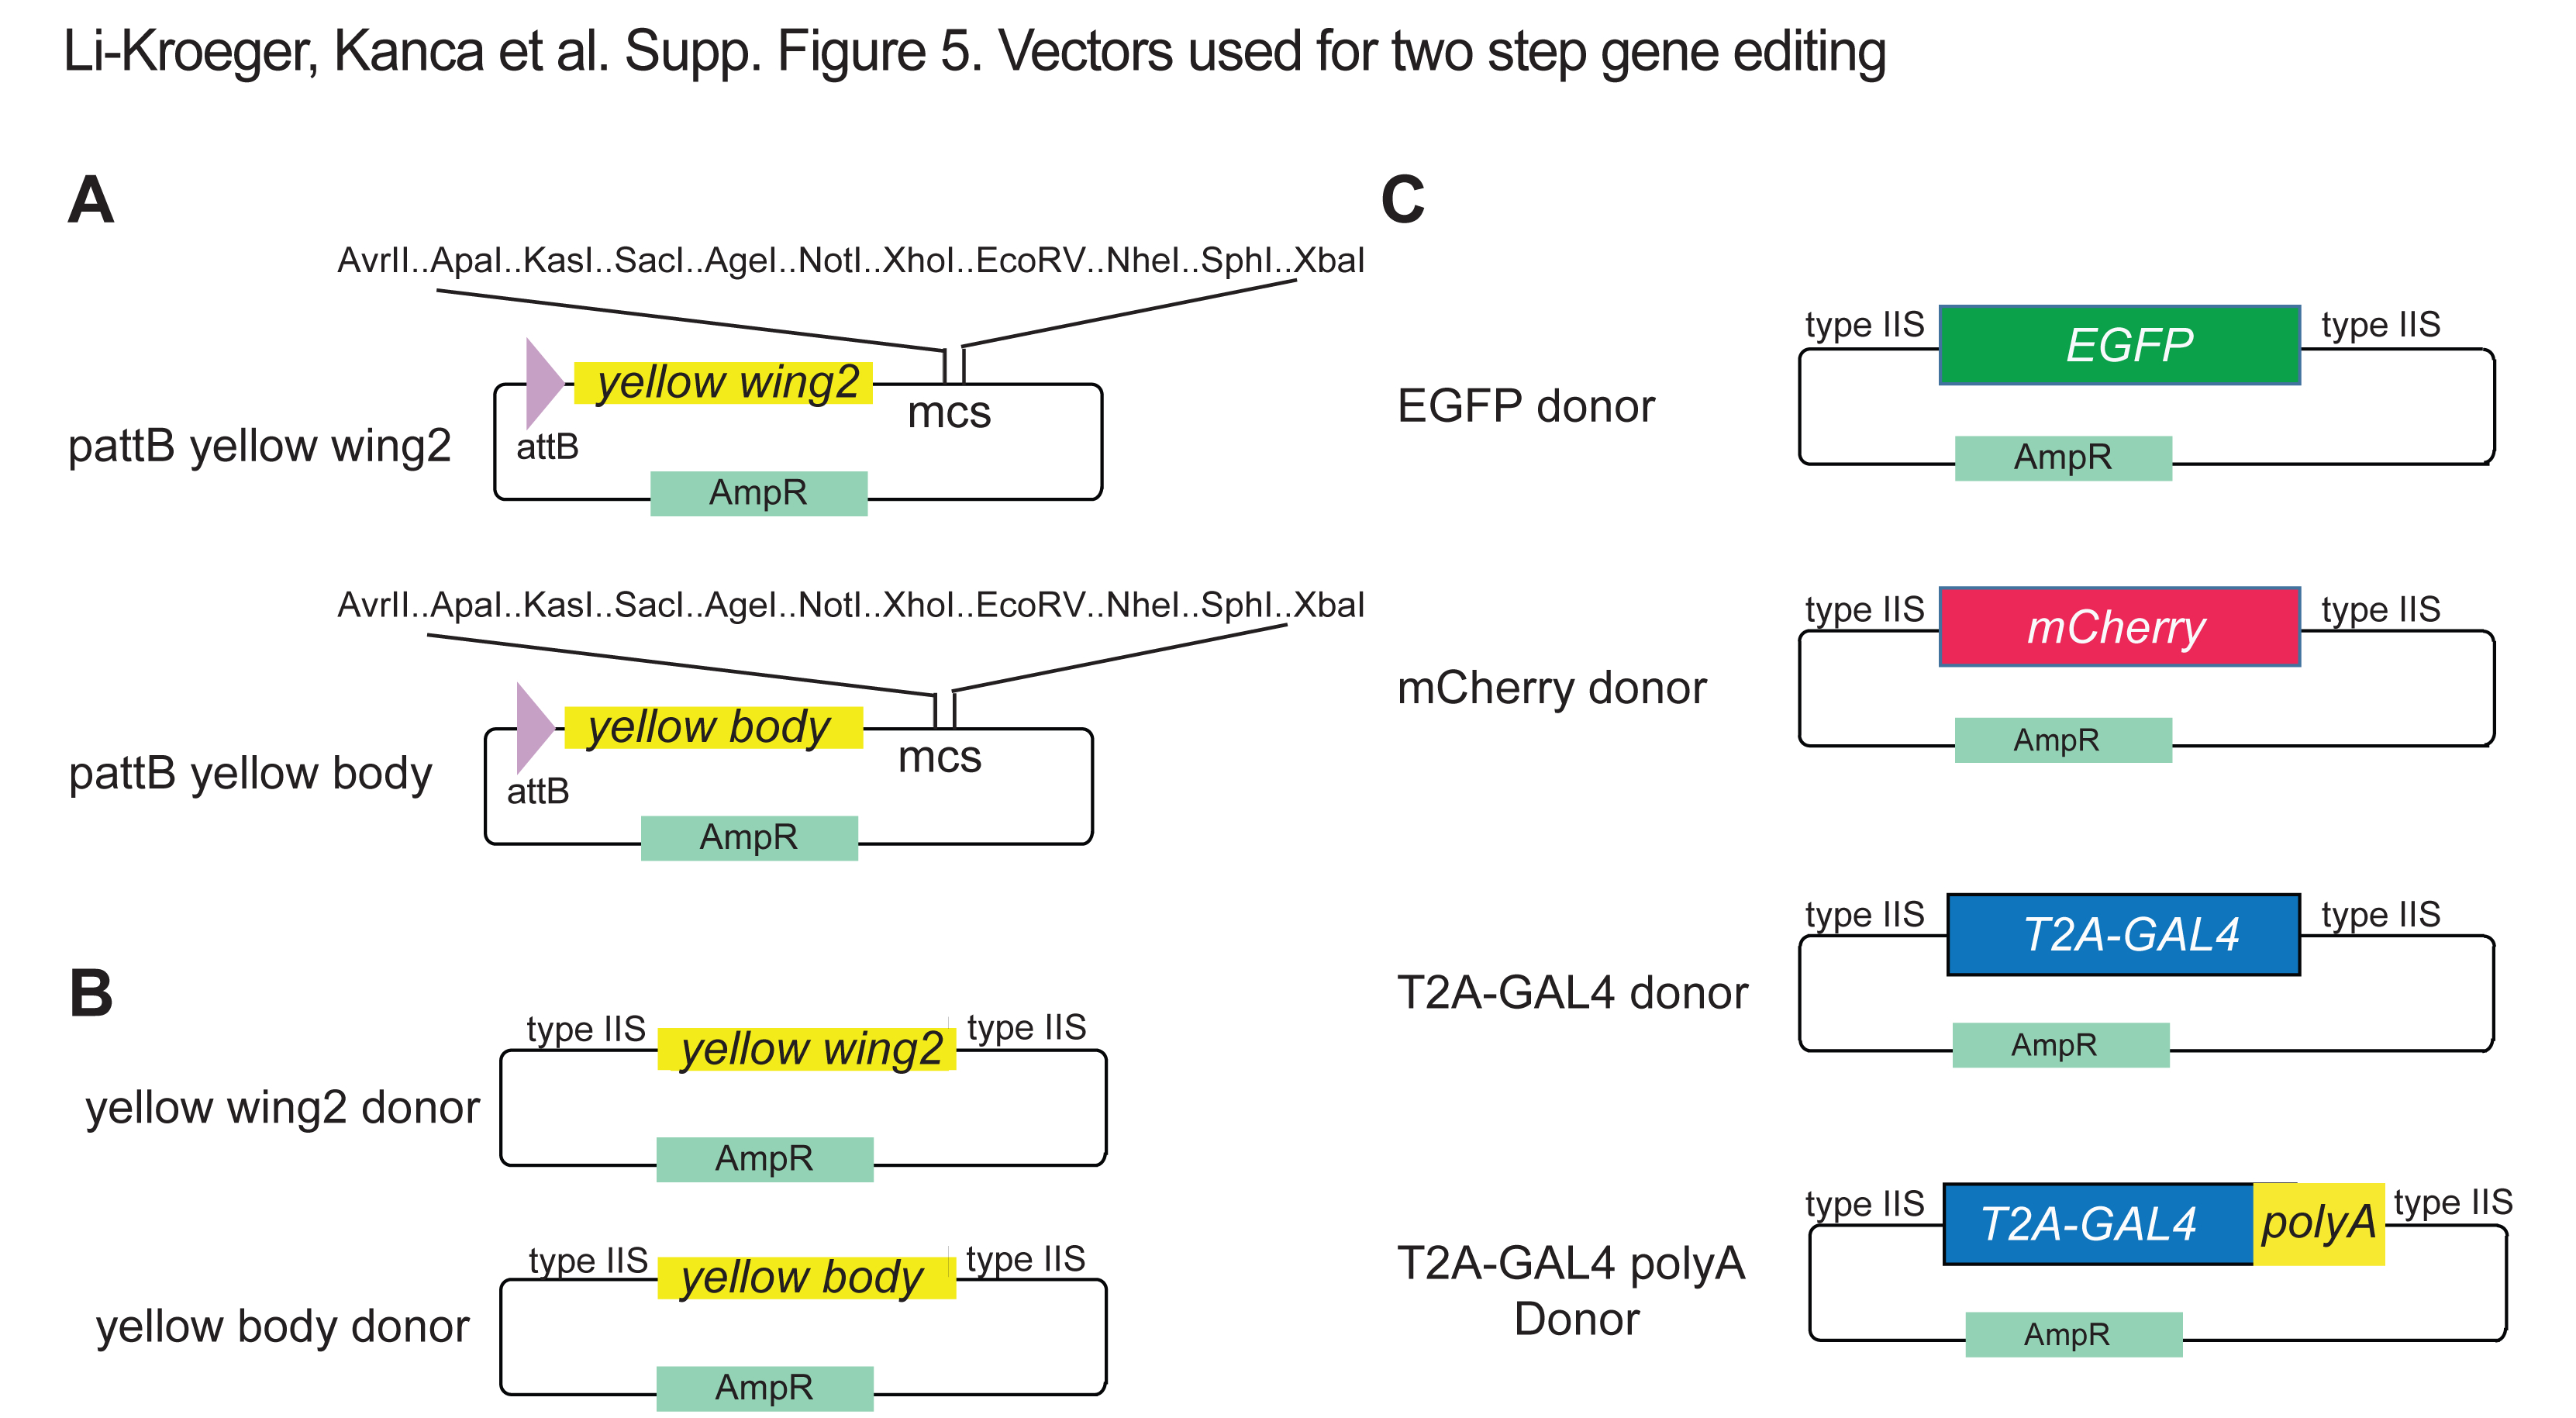

Supplement: supp [file elife-38709-supp-v1.zip › elife_poa_e38709_Figure_5_figure_supplement_1.tif]

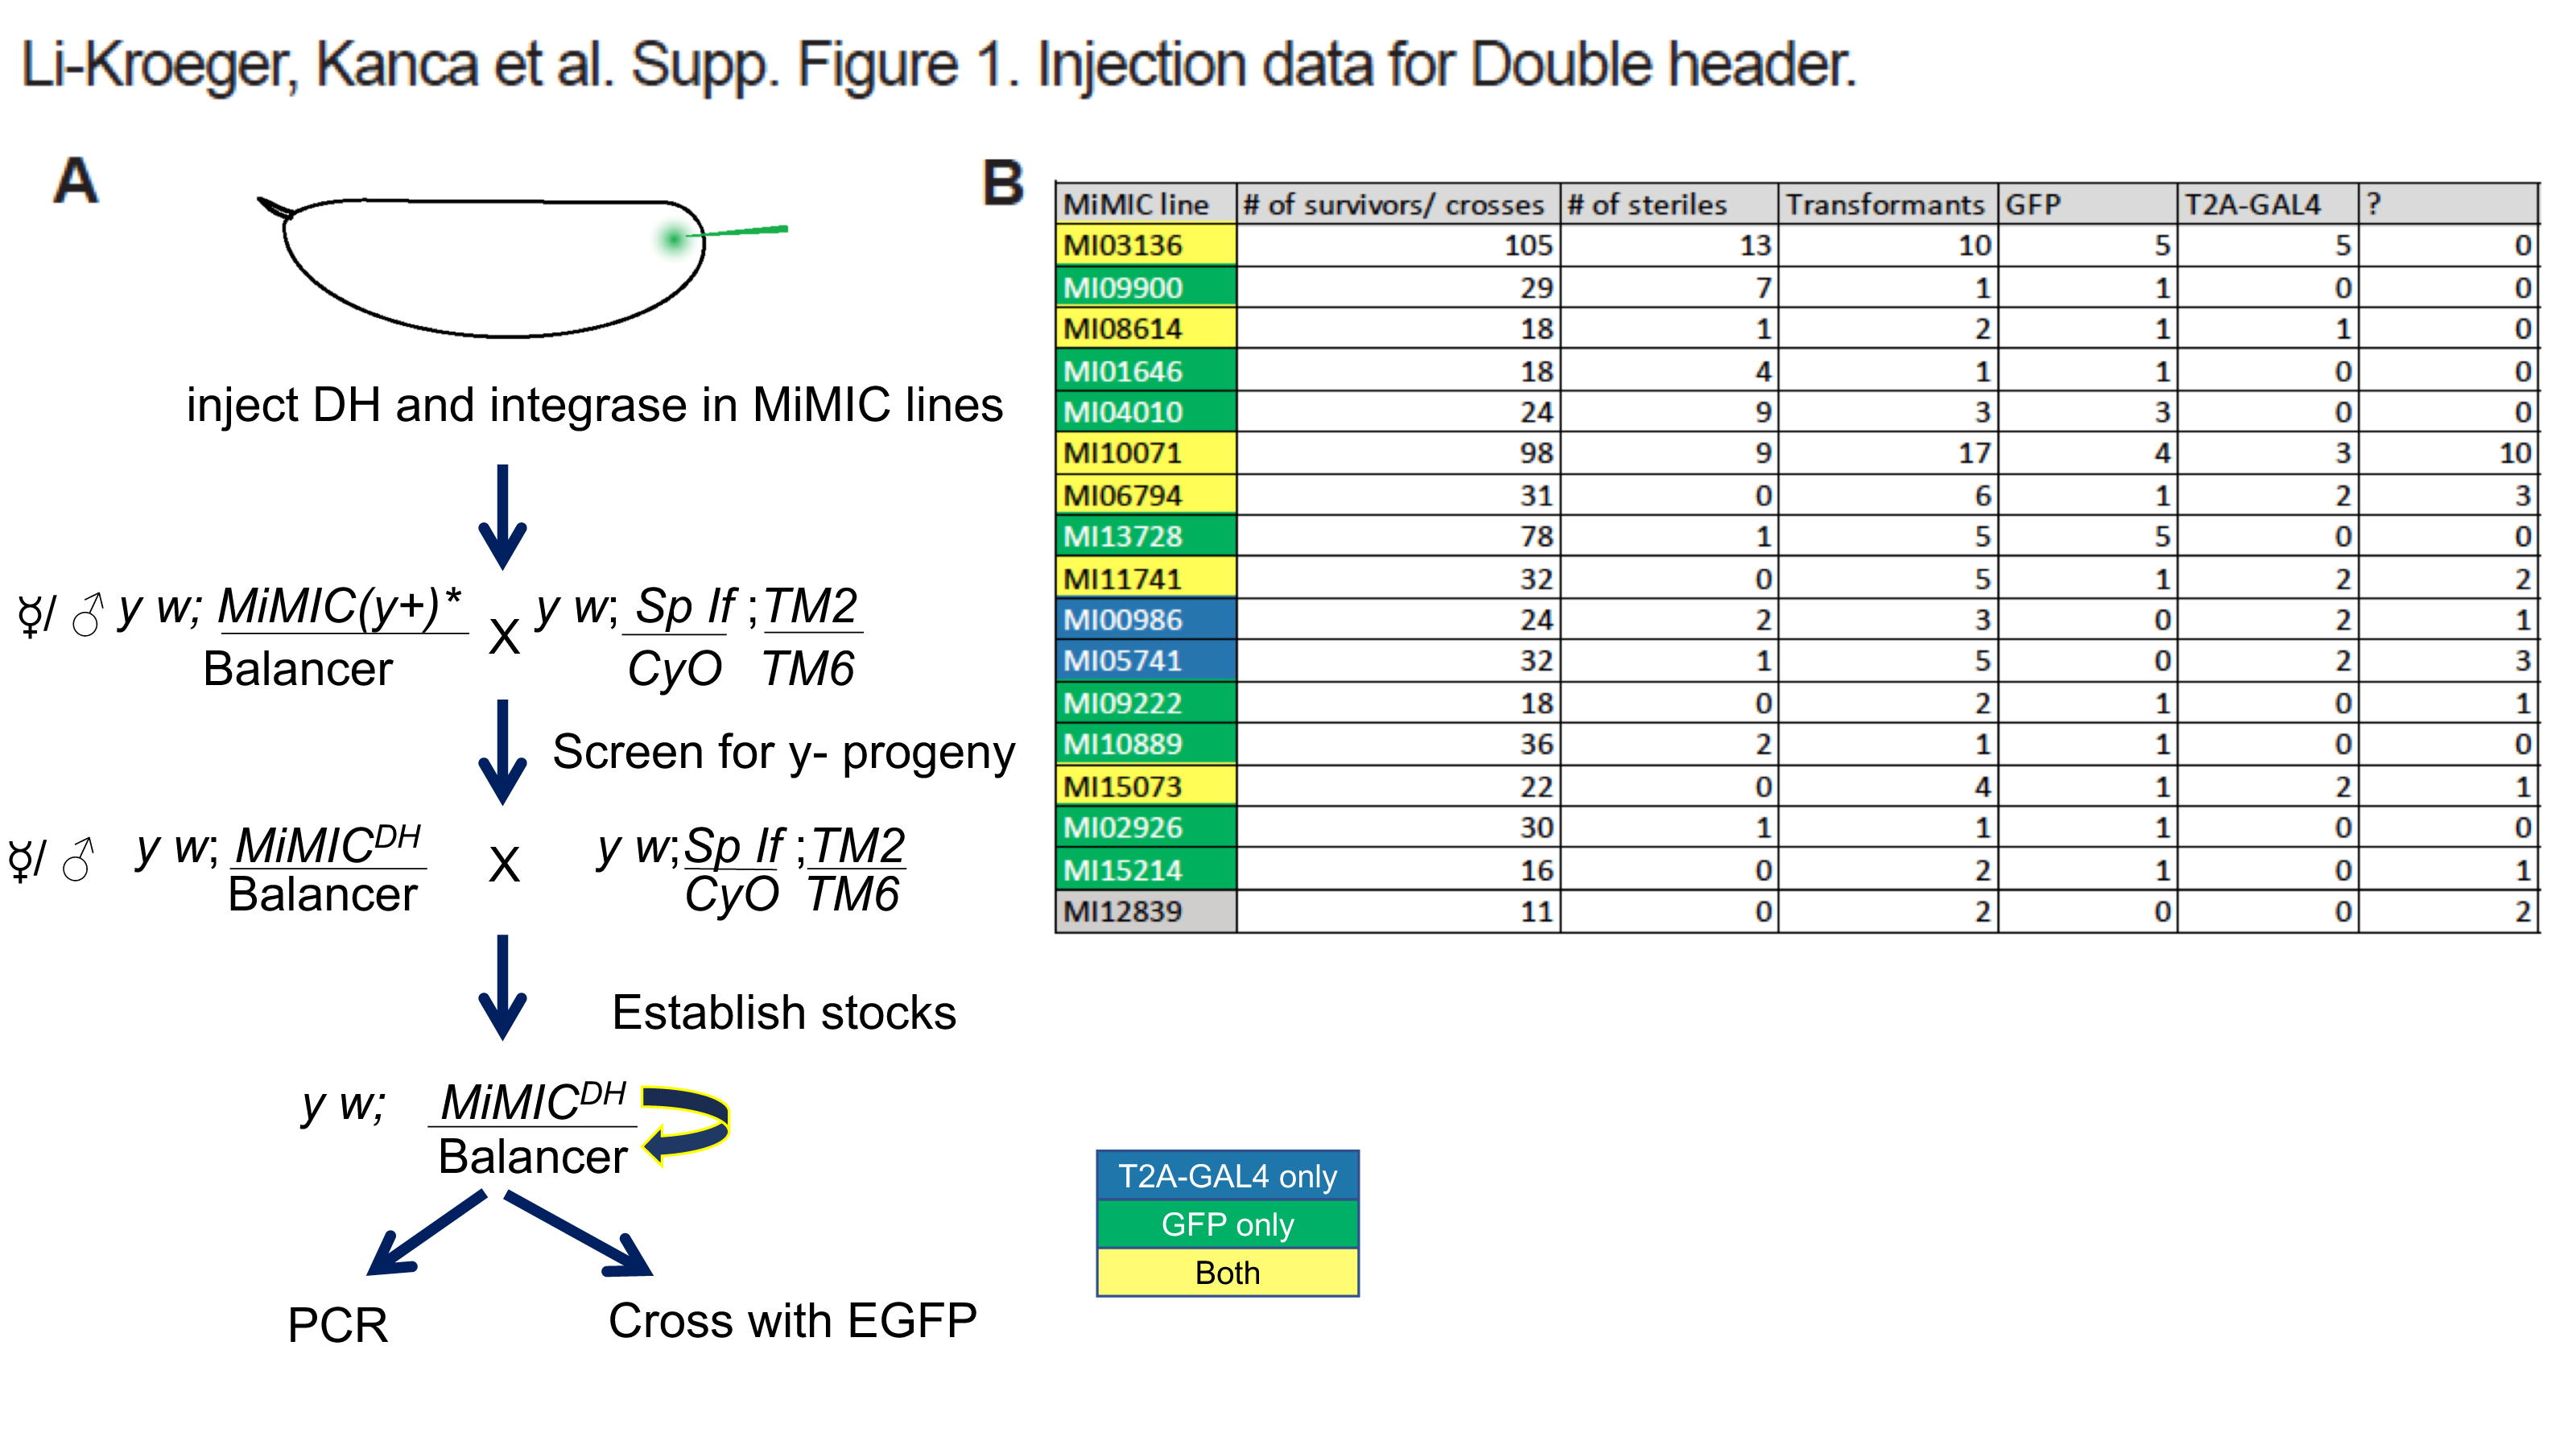

Supplement: supp [file elife-38709-supp-v1.zip › elife_poa_e38709_Figure_1_figure_supplement_1.tif]
